# Supplementary material for: Rcf1 Modulates Cytochrome c Oxidase Activity Especially Under Energy-Demanding Conditions
Source: PubMed Central journal article supplement (PMC6971206; doi:10.3389/fphys.2019.01555), 2020-01-14
Supplement: Table_1.pdf [file Table_1.pdf]

Supplementary Table 1: Strains used in this work.

| Strain name                             | Alias in this work | Source             |
|-----------------------------------------|--------------------|--------------------|
| BY4741                                  | wt                 | Euroscarf (Y00000) |
| BY4741 <i>rcf1</i> Δ                    | <i>rcf1</i> Δ      | Euroscarf (Y00543) |
| BY4741 <i>rcf2</i> Δ                    | <i>rcf2</i> Δ      | Euroscarf (Y05393) |
| BY4741 <i>rcf1rcf2</i> ΔΔ               | <i>rcf1rcf2</i> ΔΔ | This study.        |
| BY4741 <i>rcf1</i> Δ pRS403 Rcf1FLAG    | Rcf1F/Rcf1         | This study.        |
| BY4741 Rcf2FLAG                         | Rcf2F              | This study.        |
| BY4741 Cox6FLAG                         | Cox6F              | This study.        |
| W303a                                   | WT                 | This study.        |
| W303a Rcf1His10                         | Rcf1His10          | This study.        |
| W303a Rcf2His10                         | Rcf2His10          | This study.        |
| W303a Rcf1His10                         | Rcf1His10          | This study.        |
| BY4741 <i>rcf1</i> Δ pRS403 Rcf1ΔN_FLAG | Rcf1ΔN             | This study.        |
| BY4741 <i>rcf1</i> Δ pRS403 Rcf1ΔC_FLAG | Rcf1ΔC             | This study.        |

Supplementary Table 2: Primers used in this work.

| Strain/Plasmid          |                     | Sequence 5' – 3'                      |
|-------------------------|---------------------|---------------------------------------|
| <i>rcf1</i> Δ in BY4741 | For                 | CTGGTACTAGAAGCGATAACATCACAGTTATACGTT  |
| <i>rcf1rcf2</i> ΔΔ      | Rev                 | CTCTCATCATAATTTATTTACAGCAAATCGAAGAGCC |
|                         |                     | AAAATAGGCCACTAGTGGATCTG               |
| BY4741                  | For                 | GGCTACGTTTCTAACGAAGAAAGAATAAACTCCAAG  |
| Rcf2FLAG                | Rev                 | ATCTTCAAGTCGCGTACGCTGCAGGTCGACGG      |
|                         |                     | CCGGTTATTGCGCGAGAAGCCGTTAAATGTTAACTCC |
|                         |                     | GCGGGACCGACAAGCATCGATGAATTCGAGCTCG    |
| BY4741                  | For                 | GACAAGAATTGGGCGTTCCCTTAAAGGAAGAGCTAT  |
| Cox6FLAG                | Rev                 | TTCCAAGCTCTTCTCGTACGCTGCAGGTCGAC      |
|                         |                     | GTTATTTATTGTTTTATTATTTTTCCCATTTCTTTCC |
|                         |                     | TGAAATAGAACATCGATGAATTCGAGCTCG        |
| W303a Rcf1His10         | For                 | CTTAGAAAAGGAACTAAGCGACCTGGAAAATAAGCT  |
|                         | Rev                 | TGGAAAGAAGCGTACGCTGCAGGTCGAC          |
|                         |                     | GTACCGATCGTTAGCTGGCAATTACGTTACGTATGT  |
|                         |                     | GTCAAGCATCGATGAATTCGAGCTCG            |
| W303a Rcf2His10         | For                 | CCGGCTACGTTTCTAACGAAGAAAGAATAAACTCCA  |
|                         | Rev                 | AGATCTTCAAGTCGCGTACGCTGCAGGTCGAC      |
|                         |                     | CCGGTTATTGCGCGAGAAGCCGTTAAATGTTAACTCC |
|                         |                     | GCGGGACCGACATCGATGAATTCGAGCTCG        |
| W303a Cox4His10         | For                 | TACAACTAAACCCTGTTGGTGTCCAAATGATGACC   |
|                         | Rev                 | ACCATCACCGTACGCTGCAGGTCGAC            |
|                         |                     | CTTCTGCAAAGAACTTTCTTGTGGAACTTTGTTAAC  |
|                         |                     | ATGACGTGTGATCGATGAATTCGAGCTCG         |
| pRS403 Rcf1FLAG         | Rcf1 prom for NotI  | GCGGCCGCAGCACCCCTCCTCCCATTTTC         |
|                         | Flagtag+term rev    |                                       |
|                         | XhoI                | CGCTCGAGTCAAGGAGGGTATTCTGGGC          |
|                         | Spacer Flag S3 for  |                                       |
|                         | EcoRI               | GCGAATTCCGTACGCTGCAGGTCGAC            |
|                         | promRcf1-stop rev   |                                       |
|                         | EcoRI               | GCGAATTCCTTCTTTCCAAGCTTATTTTC         |
| pRS403                  | Rcf1 prom for NotI  | GCGGCCGCAGCACCCCTCCTCCCATTTTC         |
| Rcf1ΔN_FLAG             | Rcf1 Trunc1 EcoRI   | GCGAATTCCTTCTGCCTTCAGTTCCTTACCAG      |
|                         | rev                 |                                       |
| pRS403                  | Rcf1 Cterm for SmaI | CGCCCGGGGGACTTCTGGTAAGGAACTG          |
| Rcf1ΔC_FLAG             | Rcf1 Cterm rev      |                                       |
|                         | EcoRI               | CGCGAATTCCTTCTTTCCAAGCTTATTTTC        |
|                         | Cyb2 for NotI       | CCGCGGCCGCAAGCCTGCCGATATCTCCTT        |
|                         | Cyb2short rev SmaI  | GGCCCGGGGCCATTATGCCAGTTTAGATAC        |
